# Supplementary material for: Mixing modes in a population-based interview survey: comparison of a sequential and a concurrent mixed-mode design for public health research
Source: Springer Nature journal article supplement (doi:10.1186/s13690-017-0237-1), 2018-01-04
Supplement: MOESM1 [file 15426406]

**Table A1.** Missing values for health indicators by survey design and mode of data collection

|                                                     | Concurrent mixed-mode design |                      |                | Sequential mixed-mode design |                      |               |
|-----------------------------------------------------|------------------------------|----------------------|----------------|------------------------------|----------------------|---------------|
|                                                     | SAQ-Web<br>(n=124)           | SAQ-Paper<br>(n=482) | CATI<br>(n=11) | SAQ-Web<br>(n=290)           | SAQ-Paper<br>(n=264) | CATI<br>(n=7) |
|                                                     | n (%)                        | n (%)                | n (%)          | n (%)                        | n (%)                | n (%)         |
| <b>Diabetes (12-month prevalence)</b>               | 0 (0.0)                      | 36 (7.5)             | 0 (0.0)        | 0 (0.0)                      | 18 (6.8)             | 0 (0.0)       |
| <b>Hypertension (12-month prevalence)</b>           | 0 (0.0)                      | 40 (8.3)             | 0 (0.0)        | 0 (0.0)                      | 18 (6.8)             | 0 (0.0)       |
| <b>Coronary heart disease (lifetime prevalence)</b> | 0 (0.0)                      | 7 (1.5)              | 0 (0.0)        | 0 (0.0)                      | 4 (1.5)              | 0 (0.0)       |
| <b>Chronic bronchitis (lifetime prevalence)</b>     | 1 (0.8)                      | 35 (7.3)             | 1 (9.1)        | 0 (0.0)                      | 17 (6.4)             | 0 (0.0)       |
| <b>Obesity (BMI <math>\geq</math>30)</b>            | 0 (0.0)                      | 10 (2.1)             | 0 (0.0)        | 6 (2.1)                      | 12 (4.6)             | 0 (0.0)       |
| <b>Current depression</b>                           | 11 (8.9)                     | 36 (7.5)             | 0 (0.0)        | 7 (2.4)                      | 31 (11.7)            | 1 (14.3)      |
| <b>Mental well-being</b>                            | 4 (3.2)                      | 26 (5.4)             | 0 (0.0)        | 10 (3.5)                     | 22 (8.3)             | 0 (0.0)       |
| <b>Social support</b>                               | 0 (0.0)                      | 9 (1.9)              | 0 (0.0)        | 0 (0.0)                      | 9 (3.4)              | 1 (14.4)      |
| <b>Current smoking</b>                              | 0 (0.0)                      | 13 (2.7)             | 0 (0.0)        | 0 (0.0)                      | 11 (4.2)             | 0 (0.0)       |
| <b>At-risk alcohol consumption</b>                  | 2 (1.6)                      | 51 (10.6)            | 0 (0.0)        | 6 (2.1)                      | 33 (12.5)            | 0 (0.0)       |
| <b>Sport participation</b>                          | 0 (0.0)                      | 13 (2.7)             | 0 (0.0)        | 0 (0.0)                      | 3 (1.1)              | 0 (0.0)       |
| <b>Influenza vaccination (2011/2012)</b>            | 0 (0.0)                      | 20 (4.2)             | 0 (0.0)        | 1 (0.3)                      | 9 (3.4)              | 0 (0.0)       |

SAQ-Web = self-administered web survey; SAQ-Paper = self-administered paper mail questionnaire; CATI = computer-assisted telephone interview.
